# Supplementary material
Source: PubMed Central journal article supplement (PMC2242719)
Supplement: pnas_0711044105_2.pdf [file pnas_0711044105_2.pdf]

**SI Table 4.** Mutations of H77C/JFH1 in Huh7.5 cells.

| HCV gene*                            |                | Core  | p7   | NS2   | NS3   |       |       | NS4B  | NS5A  |      |      |      |      |
|--------------------------------------|----------------|-------|------|-------|-------|-------|-------|-------|-------|------|------|------|------|
| <b>Nucleotide number<sup>†</sup></b> |                |       |      |       |       |       |       |       |       |      |      |      |      |
| H77C/JFH1                            |                | 791   | 2700 | 2887  | 4080  | 4274  | 4562  | 5161  | 6039  | 6352 | 6846 | 7102 | 7375 |
| H77 abs ref                          |                | 792   | 2701 | 2888  | 4081  | 4275  | 4563  | 5162  | 6040  | 6353 | 6847 | 7115 | 7387 |
| pH77C/JFH                            |                | C     | T    | T     | A     | A     | C     | G     | C     | C    | A    | A    | C    |
| <b>Original constructs</b>           | <b>Passage</b> |       |      |       |       |       |       |       |       |      |      |      |      |
| H77C/JFH1 exp. 1                     | 1st            | .     | C/t  | .     | T     | .     | .     | .     | C/g   | C/g  | .    | A/t  | A    |
| H77C/JFH1 exp. 1                     | 2nd            | .     | C/t  | .     | T     | .     | .     | T     | G/c   | C/G  | .    | T/a  | A    |
| H77C/JFH1 exp. 2                     | 1st            | .     | .    | .     | .     | .     | T     | .     | .     | .    | .    | .    | .    |
| <b>Mutated constructs</b>            |                |       |      |       |       |       |       |       |       |      |      |      |      |
| H77C/JFH1 <sub>V787A</sub>           | 1st            | T     | C    | C     | .     | G     | .     | .     | .     | .    | C    | .    | .    |
| H77C/JFH1 <sub>Q1247L</sub>          | 1st            | .     | .    | .     | T     | .     | .     | .     | .     | .    | .    | .    | .    |
| H77C/JFH1 <sub>V787A,Q1247L</sub>    | 1st            | .     | C    | .     | T     | .     | .     | .     | .     | .    | .    | .    | .    |
| H77C/JFH1 <sub>R1408W</sub>          | 1st            | .     | .    | .     | .     | .     | T     | .     | .     | .    | .    | .    | .    |
| <b>Amino acid number<sup>†</sup></b> |                |       |      |       |       |       |       |       |       |      |      |      |      |
| H77C/JFH1                            |                | 787   |      | 1247  | 1312  | 1408  | 1607  | 1900  | 2169  |      |      |      |      |
| H77 abs ref                          |                | 787   |      | 1247  | 1312  | 1408  | 1607  | 1900  | 2169  |      |      |      |      |
| <b>Change</b>                        |                | V → A |      | Q → L | I → V | R → W | M → I | A → G | D → A |      |      |      |      |

\*H77C, orange; JFH1, black.

<sup>†</sup>Positions are numbered according to the HCV sequence of pH77C/JFH1. Corresponding H77 reference positions (AF009606) are given.

Mutations representing > 50% of the direct sequence read in at least one passage are shown. Dots indicate identity with the original plasmid sequence. Positions with mixtures are written with the dominant sequence in capital and the minor sequence in lower case letters.

Highlighted positions are mutations engineered into H77C/JFH1.
